# Supplementary material
Source: publisher site journal article supplement (doi:10.18632/aging.203591)
Supplement: Supplementary file 1 [file aging-v13-203591-supplementary-material-SD1.pdf]

SUPPLEMENTARY FIGURES

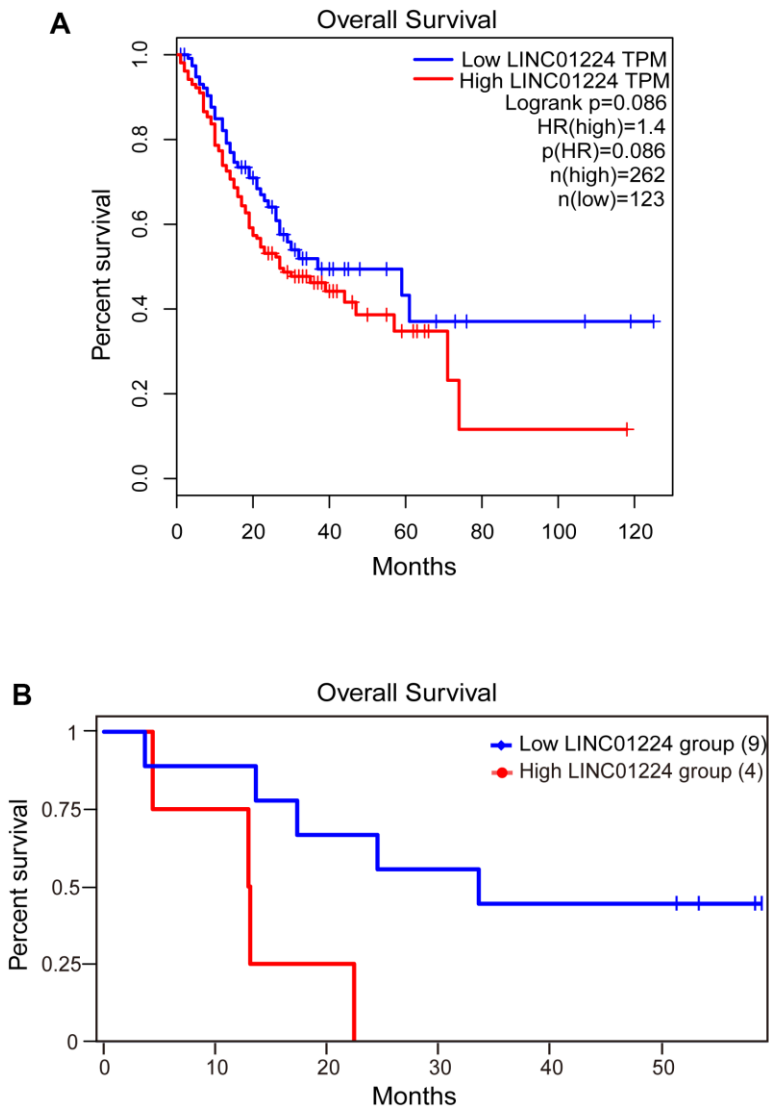

**Supplementary Figure 1. The correlation between the expression level of LINC01224 and OS of GC patients.** (A) The OS rate of GC patients in the high LINC01224 expression group was lower than that of patients in the low LINC01224 expression group that analyzed the TCGA database using the GEPIA. (B) The analysis of GSE38749 dataset performed using the InCAR website indicated that GC patients in the high LINC01224 expression group had a lower OS rate than those in the low LINC01224 expression group.

**A**

| Data ID | Sequence Name     | RNA Size | ORF Size | Fickett Score | Hexamer Score   | Coding Probability  | Coding Label |
|---------|-------------------|----------|----------|---------------|-----------------|---------------------|--------------|
| 0       | ENST00000596283.5 | 2766     | 204      | 0.6975        | -0.480418477445 | 0.00087563467139802 | no           |
| 1       | LINC01224-203     | 194      | 6        | 0.3194        | -3.34444417906  | 2.2520034605241E-13 | no           |
| 2       | LINC01224-203     | 106      | 6        | 0.6163        | 0.754487205573  | 0.24589743023214    | no           |
| 3       | LINC01224-203     | 78       | 36       | 0.7387        | -0.451578417299 | 0.00023097401553011 | no           |
| 4       | LINC01224-203     | 158      | 48       | 0.8568        | -0.191563923545 | 0.0021071812229215  | no           |
| 5       | LINC01224-203     | 28       | 9        | 0.7426        | 0.5763771108    | 0.13440296780496    | no           |
| 6       | LINC01224-203     | 288      | 57       | 0.8583        | -0.044335325539 | 0.0060954366506059  | no           |
| 7       | LINC01224-203     | 336      | 66       | 0.4147        | -0.191843738299 | 0.00063111150515418 | no           |
| 8       | LINC01224-203     | 1578     | 204      | 0.6975        | -0.480418477445 | 0.00094106959004621 | no           |
| 9       | LINC01224-203     | 1792     | 147      | 0.7585        | -0.24959196441  | 0.0027838498039605  | no           |
| 10      | LINC01224-203     | 664      | 192      | 0.7466        | -0.374857558437 | 0.0020444802640556  | no           |
| 11      | LINC01224-203     | 149      | 6        | 0.3299        | -2.90185301361  | 4.3368286332487E-12 | no           |
| 12      | LINC01224-203     | 1203     | 207      | 0.4736        | -0.241649972359 | 0.0023773854266959  | no           |
| 13      | LINC01224-203     | 226      | 0        | 0             | 0               | 0.00030024298547403 | no           |
| 14      | LINC01224-203     | 693      | 81       | 0.6674        | -0.397629793384 | 0.00041301298044843 | no           |
| 15      | LINC01224-203     | 1129     | 192      | 0.8405        | -0.320245573025 | 0.0038218286929068  | no           |

**B**

Sequence ENST00000596283.5 got Fickett score 0.28007 with a complete putative ORF 68 AA, a pI 7.71917724609, which, in total, classify it as a noncoding sequence with coding probability 0.0321526.

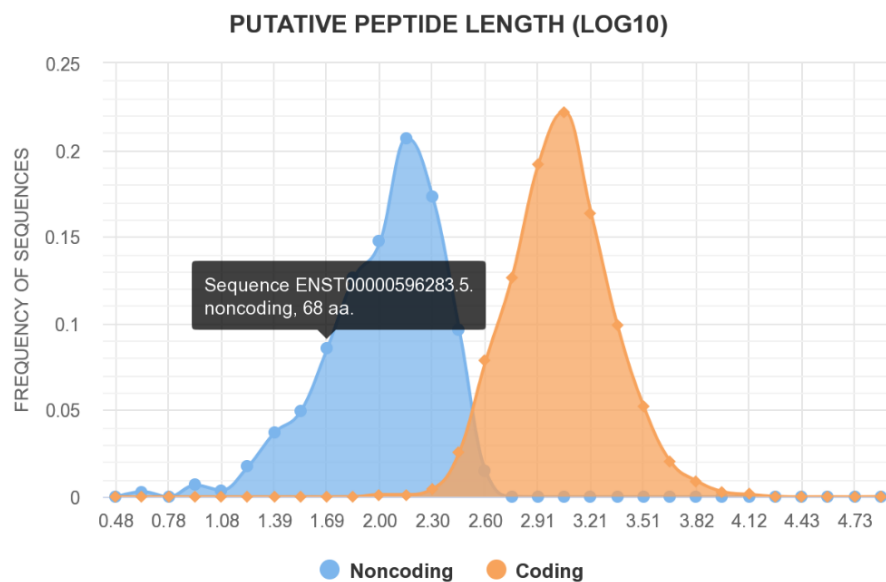

**Supplementary Figure 2. The prediction of the protein-coding ability of LINC01224.** (A) The predicted results of CPAT website indicated that the transcript ENST00000596283.5 of LINC01224 had no protein-coding ability. (B) The CPC website's predicted results indicated that the transcript ENST00000596283.5 of LINC01224 is a noncoding sequence with coding probability 0.0321526.
