# Supplementary material
Source: publisher site journal article supplement (doi:10.18632/aging.203591)
Supplement: Supplementary file 2 [file aging-v13-203591-supplementary-material-SD2.pdf]

**SUPPLEMENTARY TABLE**

**Supplementary Table 1. The list of primers and sh-RNAs sequence.**

|                | <b>Forward</b>                                                       | <b>Reverse</b>                                                           |
|----------------|----------------------------------------------------------------------|--------------------------------------------------------------------------|
| LINC01224      | 5'- ACGTGCACAGACAGCTAAGA-3'                                          | 5'-ATCATCCACGGGAGTGACGA-3'                                               |
| YES1           | 5'-TTGGAGGTGCATCTTCCTC-3'                                            | 5'-CCACAAATATAGTAACACCACCTG-3'                                           |
| KDEL3          | 5'-CACTCTGCTGGAGATCCTC-3'                                            | 5'-TTGCTGATCATGAAGAGCT-3'                                                |
| XYLB           | 5'-TTCGAGCACTAATTGAAGGAC-3'                                          | 5'-TTGCTTTGGACATGACTCG-3'                                                |
| SIGMAR1        | 5'-GAAGAGATAGCGCAGTTGG-3'                                            | 5'-CTCCACGATCAGACGAGAG-3'                                                |
| GAPDH          | 5'-TCAAGATCATCAGCAATGCC-3'                                           | 5'-CGATACCAAAGTTGTCATGGA-3'                                              |
| U6             | 5'-ATACAGAGAAAGTTAGCACGG-3'                                          | 5'-GGAATGCTTCAAAGAGTTGTG-3'                                              |
| miR-4436a      | 5'-ATGGCAGGACAGGCAGAAG-3'                                            | 5'-GTCGTATCCAGTGCAGGGTC-3'                                               |
| miR-2467-3p    | 5'-TCGAGCAGAGGCAGAGAGG-3'                                            | 5'-GTCGTATCCAGTGCAGGGTC-3'                                               |
| miR-193a-5p    | 5'-GGTCTTTGCGGGCGAGATG-3'                                            | 5'-GTCGTATCCAGTGCAGGGTC-3'                                               |
| miR-650        | 5'-TAGGAGGCAGCGCTCTCAG-3'                                            | 5'-GTCGTATCCAGTGCAGGGTC-3'                                               |
| miR-3612       | 5'-CTAGCGAGGAGGCATCTTGAG-3'                                          | 5'-GTCGTATCCAGTGCAGGGTC-3'                                               |
| miR-5000-3p    | 5'-CGCGTCAGGACACTTCTGAAC-3'                                          | 5'-GTCGTATCCAGTGCAGGGTC-3'                                               |
| miR-6884-5p    | 5'-TGCGAGAGGCTGAGAAGGT-3'                                            | 5'-GTCGTATCCAGTGCAGGGTC-3'                                               |
| miR-29b-3p     | 5'-TCCGTAGCACCATTTGAAATCAG-3'                                        | 5'-GTCGTATCCAGTGCAGGGTC-3'                                               |
| miR-29a-3p     | 5'-CGCGTAGCACCATCTGAAATCG-3'                                         | 5'-GTCGTATCCAGTGCAGGGTC-3'                                               |
| miR-29c-3p     | 5'-CGCGTAGCACCATTTGAAATCG-3'                                         | 5'-GTCGTATCCAGTGCAGGGTC-3'                                               |
| sh-LINC01224-1 | 5'-CCGGTACTCTCCTGCCTGGATTTAACTCGAG<br>TTAAATCCAGGCAGGAGAGTATTTTTG-3' | 5'-AATTCAAAAATACTCTCCTGCCTGGA<br>TTTAACTCGAGTTAAATCCAGGCAGGAGAG<br>TA-3' |
| sh-LINC01224-2 | 5'-CCGGGATCAAAGGCGCCTGTAATTTCTCGAGAA<br>ATTACAGGCGCCTTTGATCTTTTTG-3' | 5'-AATTCAAAAAGATCAAAGGCGCCTG<br>TAATTTCTCGAGAAATTACAGGCGCCTTTG<br>ATC-3' |
| sh-YES1        | 5'-CCGGGCTGATGGTATGGCATATATTCAAGAG<br>ATATATGCCATACCATCAGCTTTTTTG-3' | 5'-AATTCAAAAAGCTGATGGTATGGCA<br>TATATCTTTGAATATATGCCATACCATCA<br>GC-3'   |
| sh-control     | 5'-CCGGTTCTCCGAACGTGTCACGTTTCAAGAGAA<br>CGTGACACGTTCCGAGAATTTTTG-3'  | 5'-AATTCAAAAATTCTCCGAACGTGT<br>CACGTTCTTTGAAACGTGACACGTTCCG<br>AGAA-3'   |
